# Supplementary material
Source: publisher figshare collection journal article supplement (https://acs.figshare.com/ndownloader/files/4597693)
Supplement: Supplementary file 1 [file 4597693]

## Supporting Information

# Copper $\beta$ -Octakis(trifluoromethyl)corroles: New Paradigms for Ligand Substituent Effects in Transition Metal Complexes

Kolle Ekaney Thomas, Ingar H. Wasbotten, and Abhik Ghosh\*

Department of Chemistry and Center for Theoretical and Computational Chemistry,  
University of Tromsø, N-9037 Tromsø, Norway; [abhik@chem.uit.no](mailto:abhik@chem.uit.no)

### Table of contents

|                         |     |
|-------------------------|-----|
| Proton NMR spectra      | S2  |
| Fluorine-19 NMR spectra | S10 |
| Mass Spectra            | S20 |
| Elemental Analyses      | S24 |

## Proton NMR Spectra

**Figure S1.**  $^1\text{H}$  NMR spectra of  $\text{Cu}[(\text{CF}_3)_8\text{T}(p\text{-MeP})\text{C}]$ : (a) the full range, (b) expanded views of the peaks, and (c) the  $^1\text{H} - ^1\text{H}$  COSY.

(a)

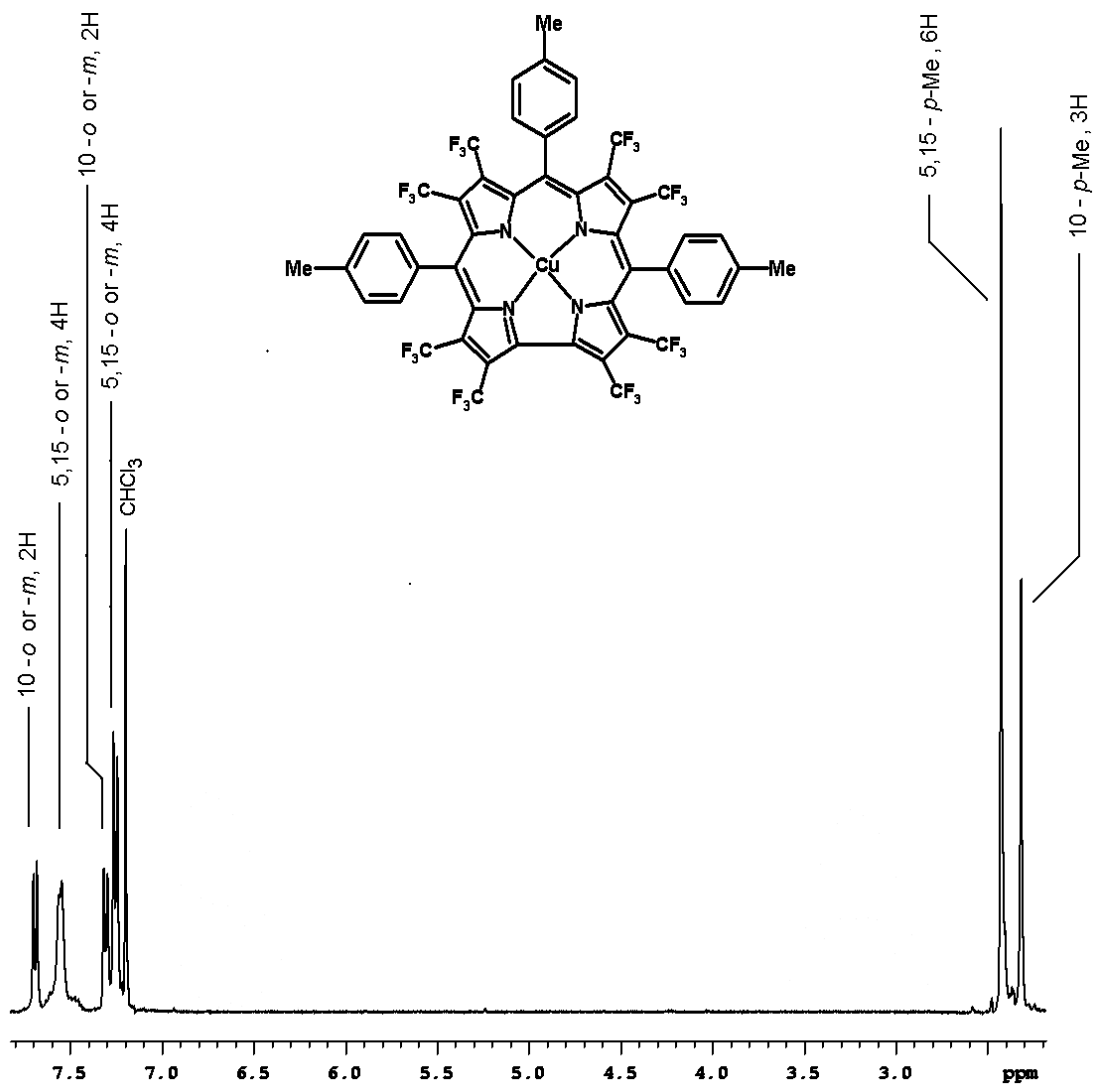

(b)

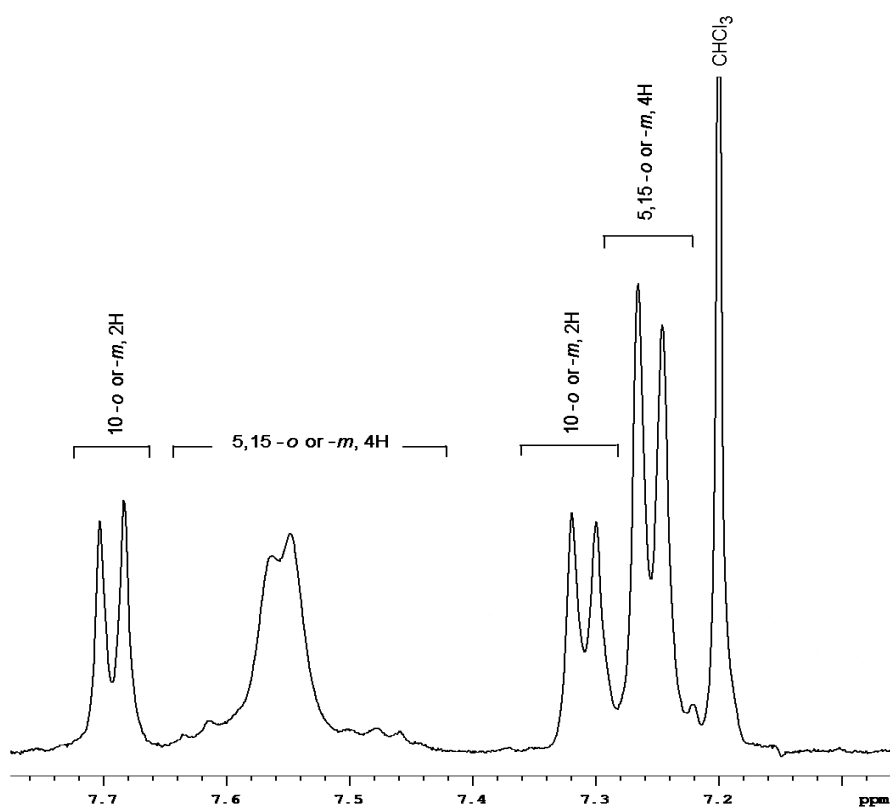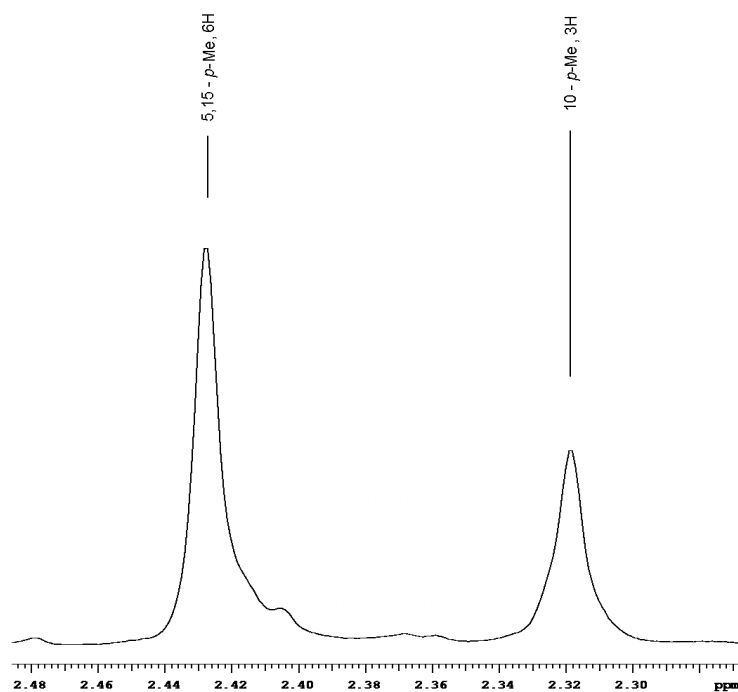

(c)

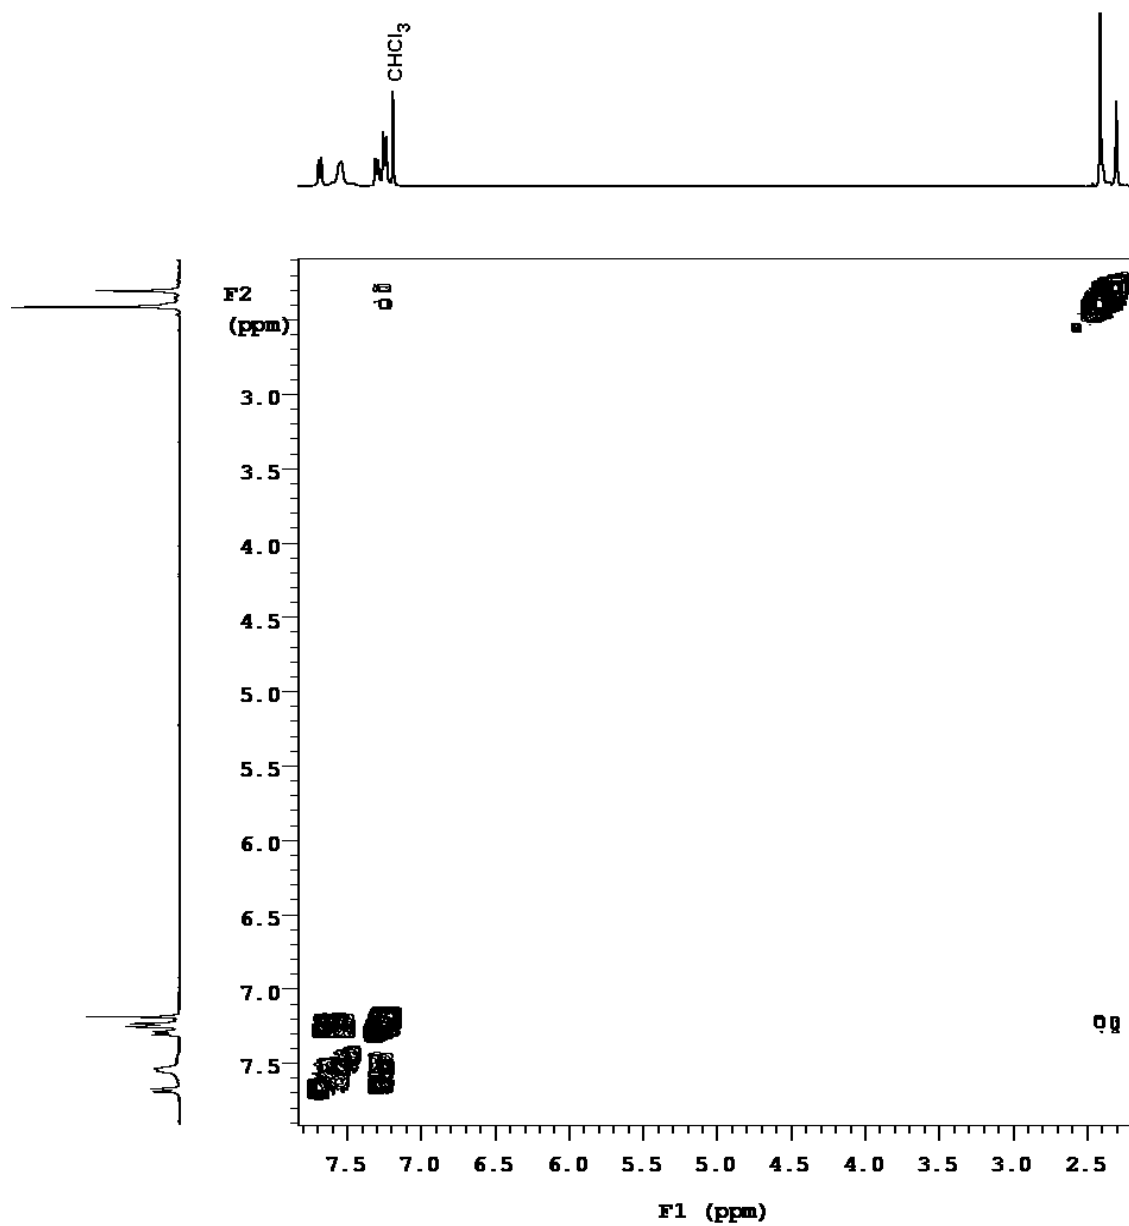

**Figure S2.**  $^1\text{H}$  NMR spectra of  $\text{Cu}[(\text{CF}_3)_8\text{T}(p\text{-OMeP})\text{C}]$ : (a) the full range, (b) expanded views of the peaks, and (c) the  $^1\text{H}$  -  $^1\text{H}$  COSY.

(a)

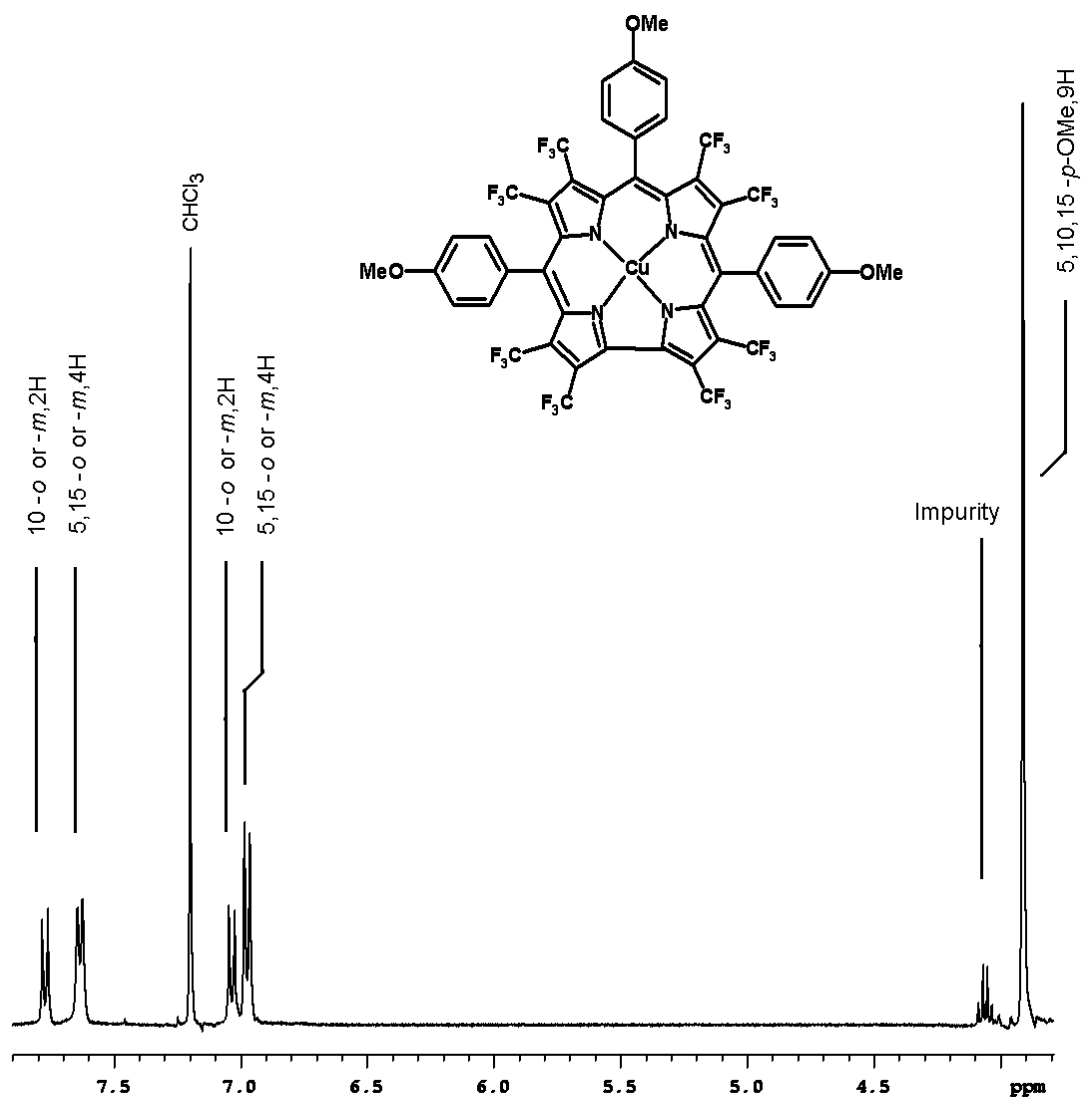

(b)

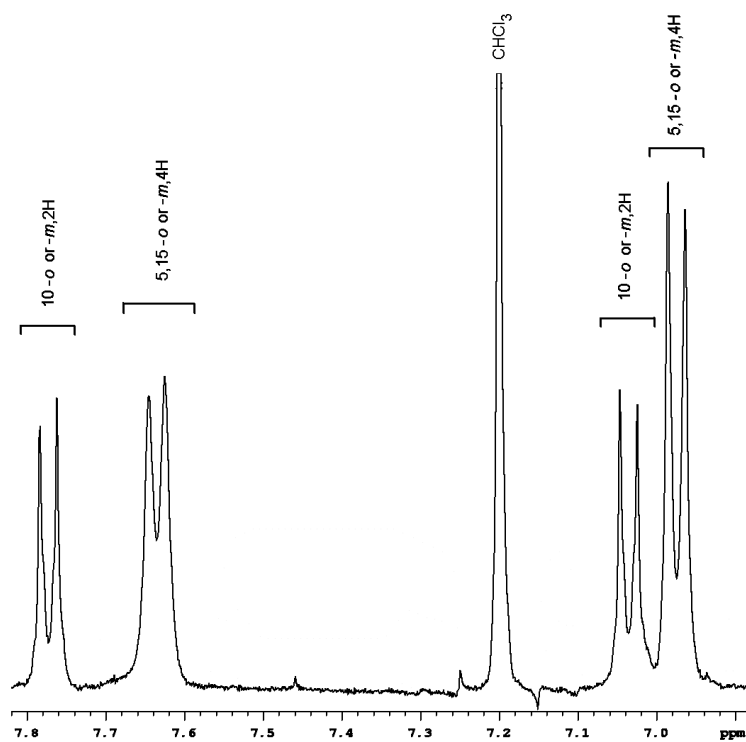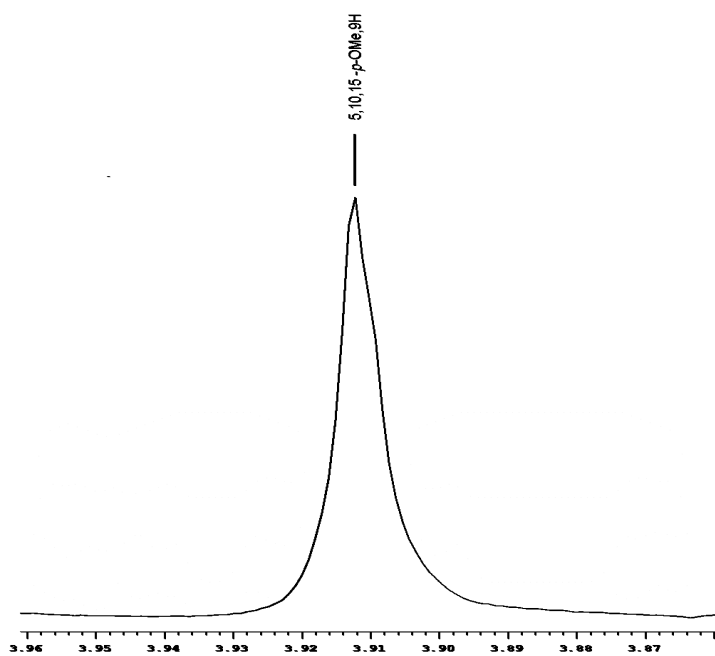

(c)

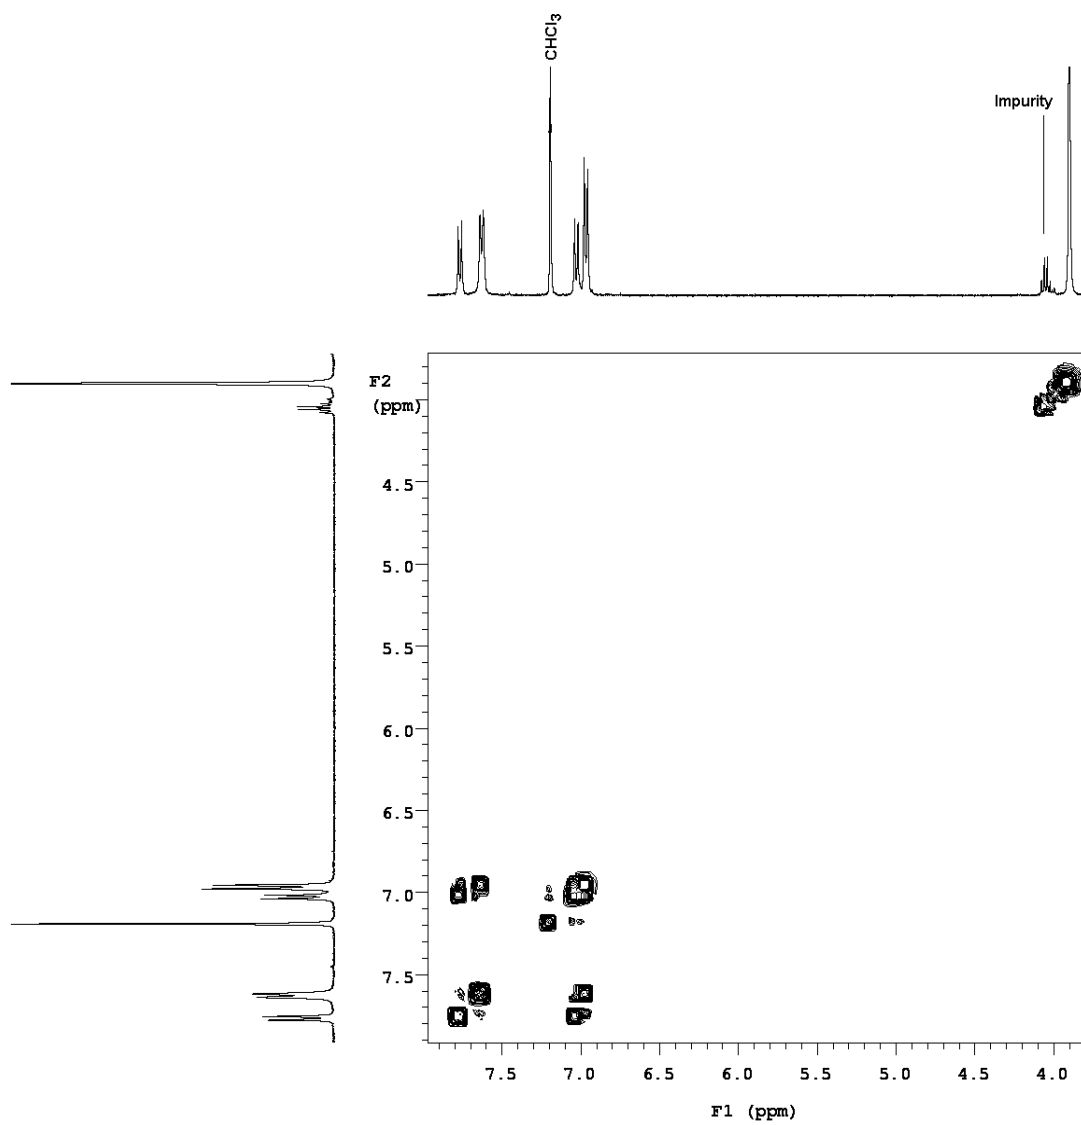

**Figure S3.**  $^1\text{H}$  NMR spectra of  $\text{Cu}[(\text{CF}_3)_8\text{T}(p\text{-FP})\text{C}]$ : (a) the full range, and (b) the  $^1\text{H}$  -  $^1\text{H}$  COSY.

(a)

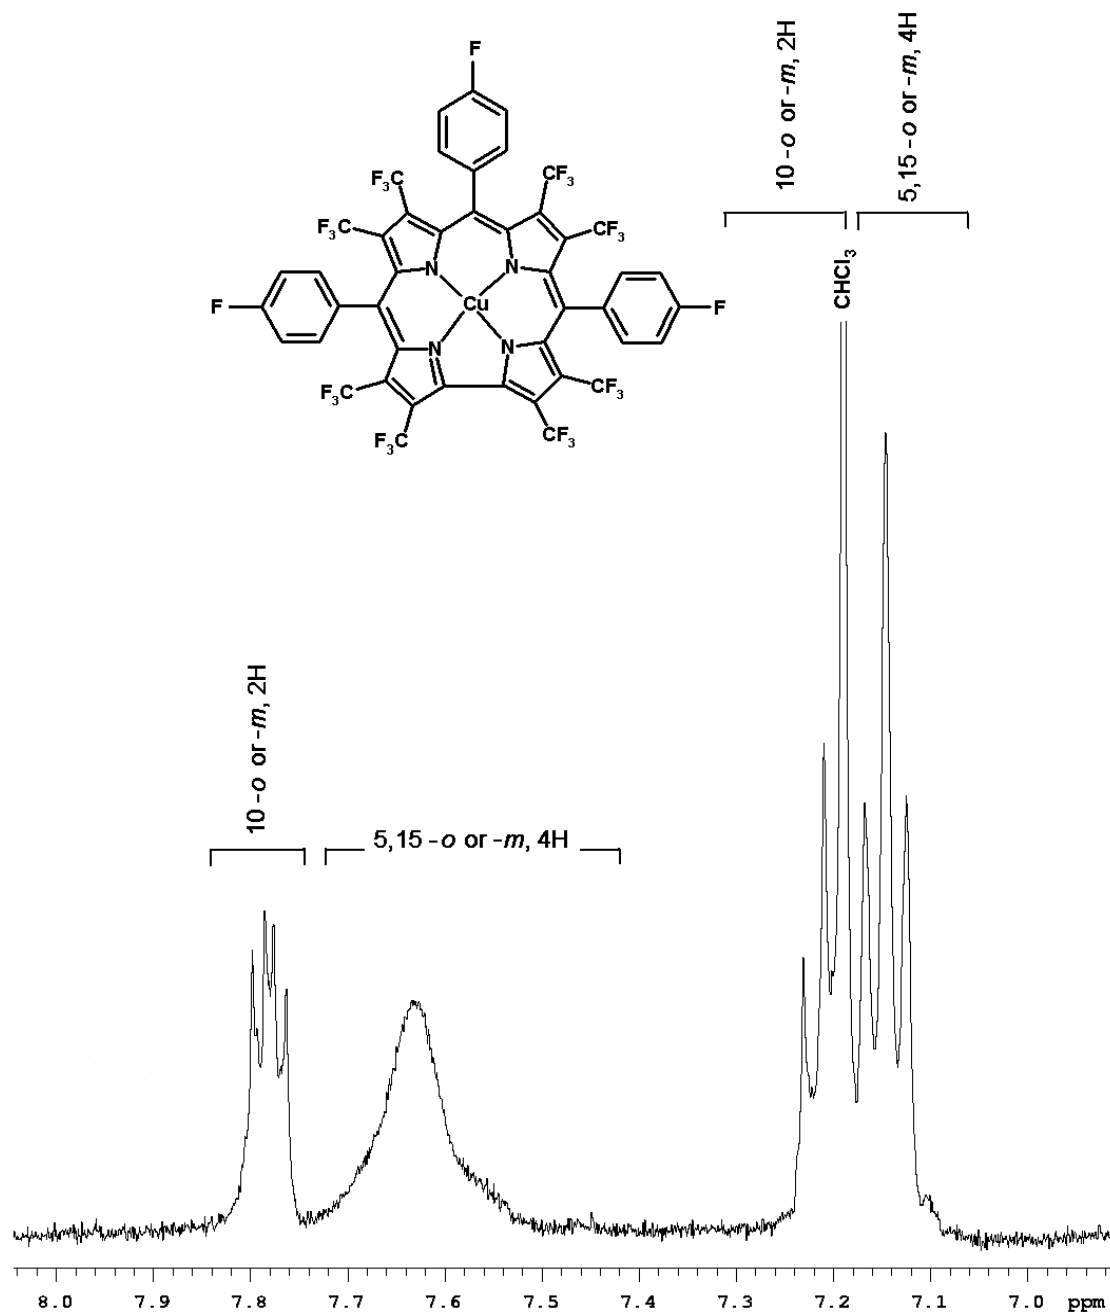



(b)

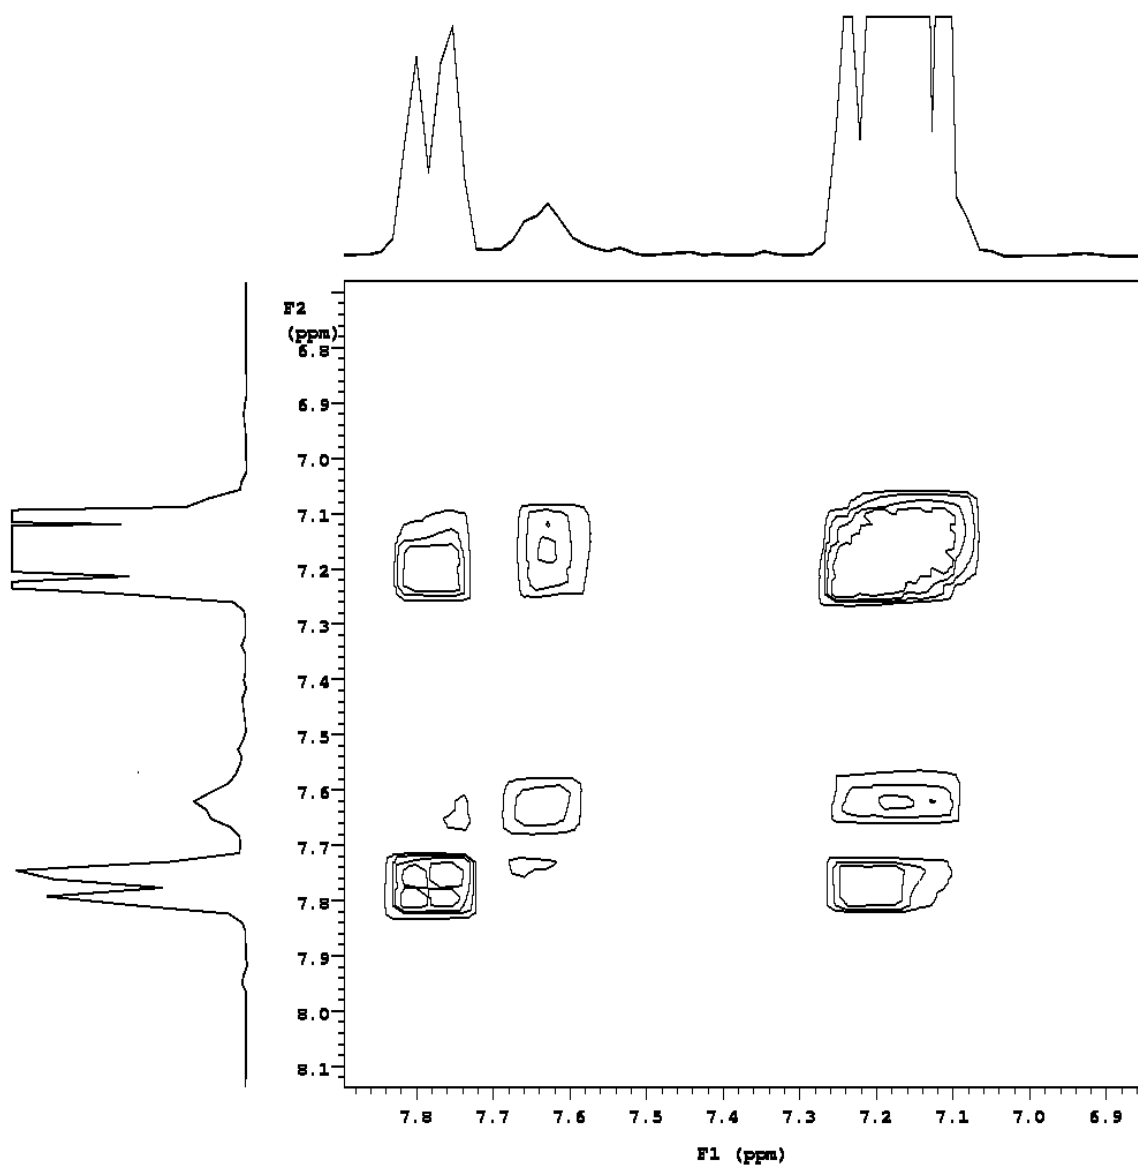

## Fluorine-19 NMR Spectra

**Figure S4.**  $^{19}\text{F}$  NMR spectra of  $\text{Cu}[(\text{CF}_3)_8\text{T}(p\text{-MeP})\text{C}]$ : (a) the full range, (b) expanded views of the peaks, and (c) the  $^{19}\text{F}$ - $^{19}\text{F}$  COSY.

(a)

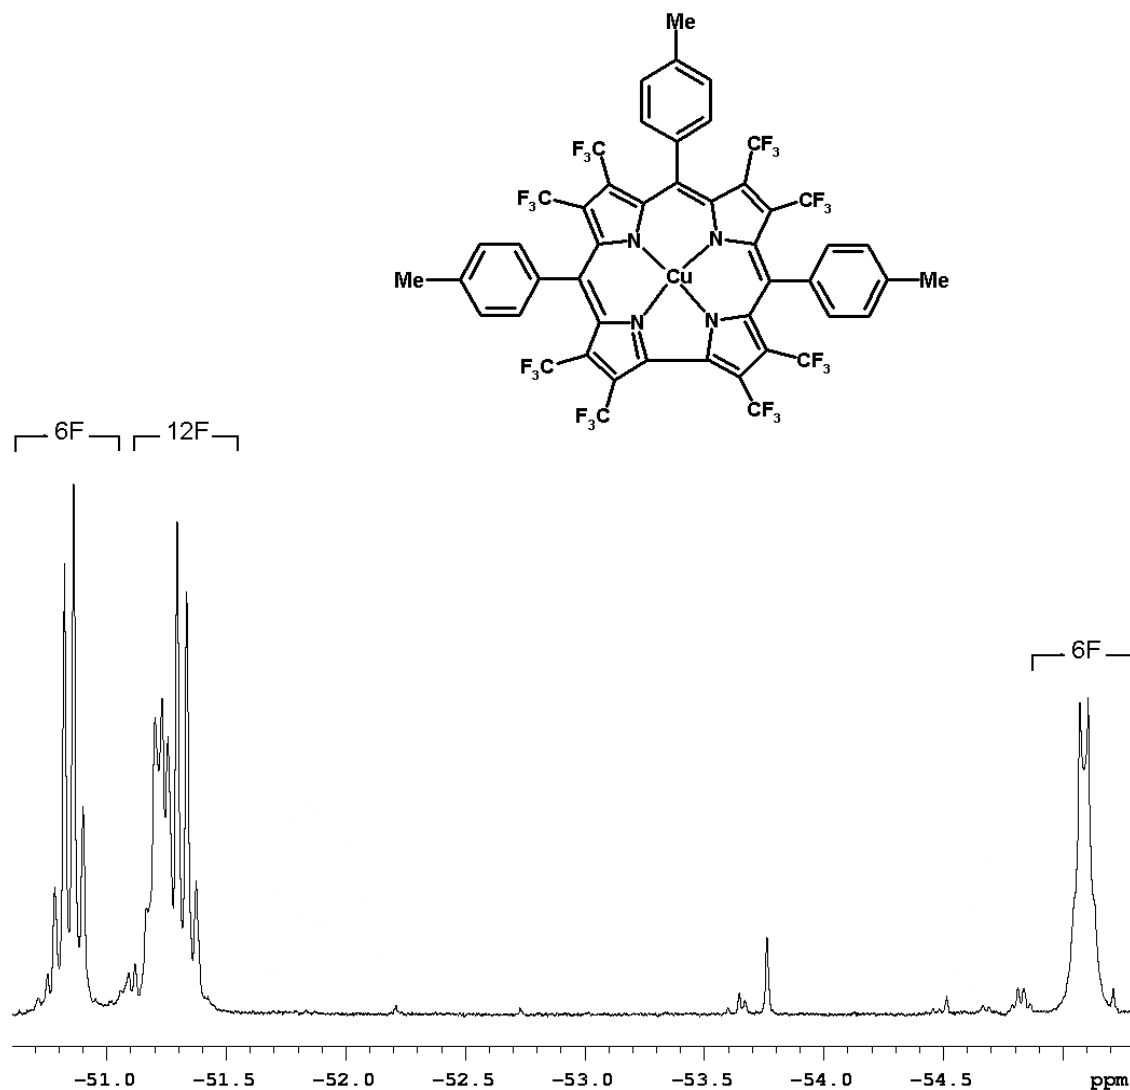

(b)

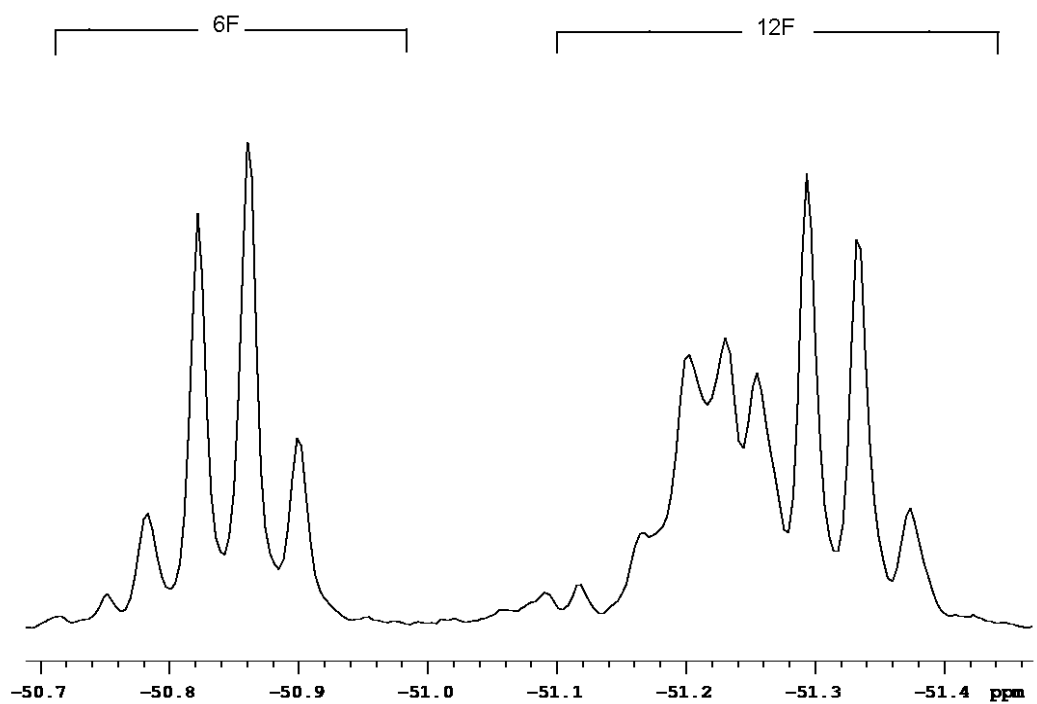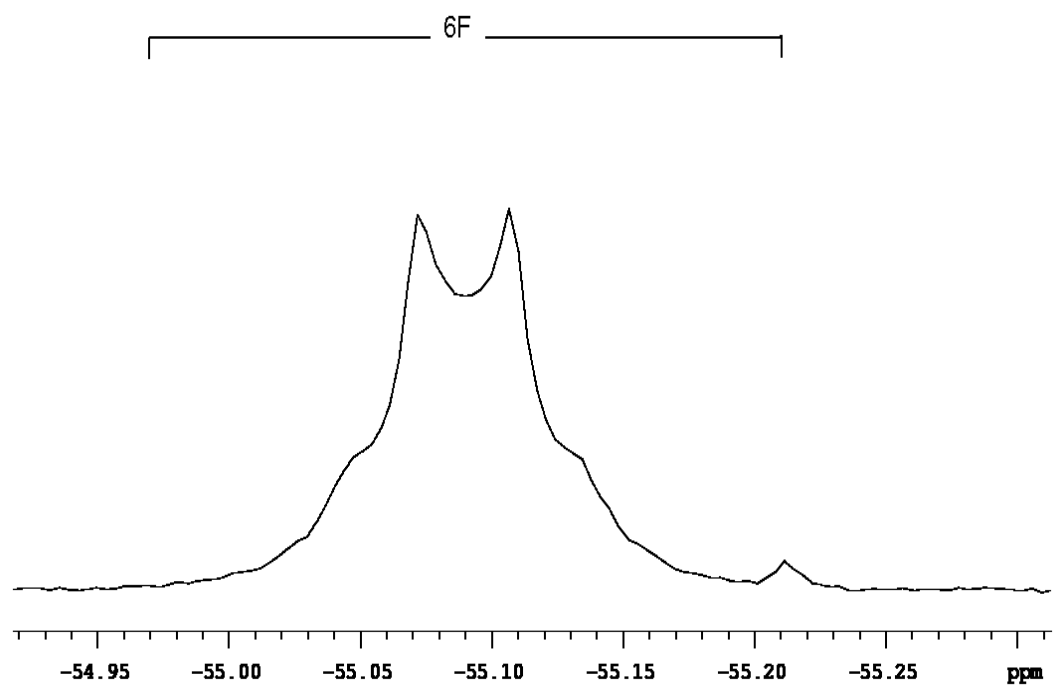

(c)

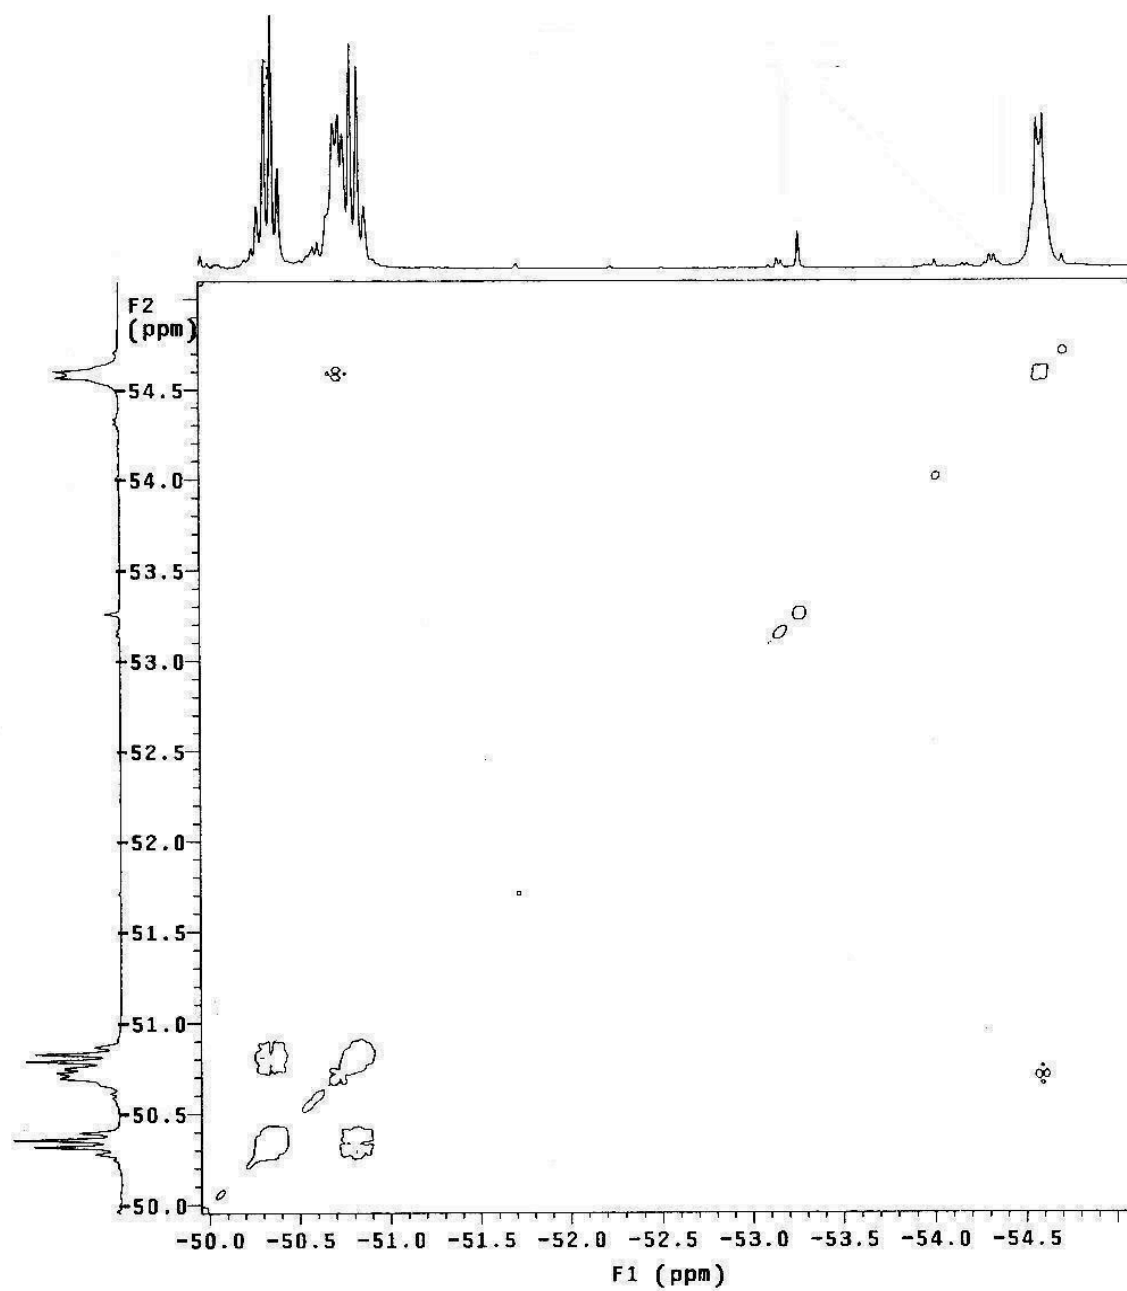

**Figure S5.**  $^{19}\text{F}$  NMR spectra of  $\text{Cu}[(\text{CF}_3)_8\text{T}(p\text{-OMeP})\text{C}]$ : (a) the full range, (b) expanded views of the peaks, and (c) the  $^{19}\text{F}$ - $^{19}\text{F}$  COSY.

(a)

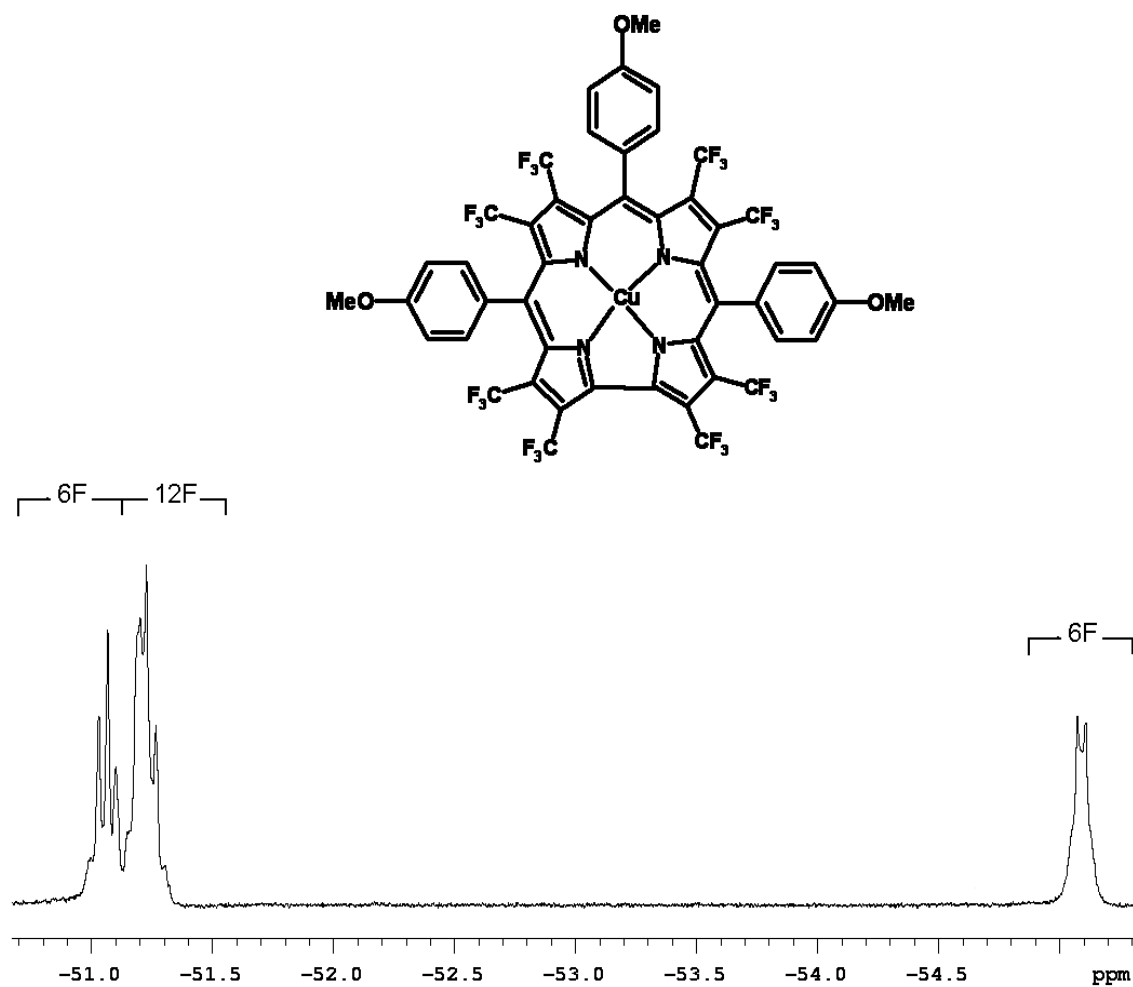

(b)

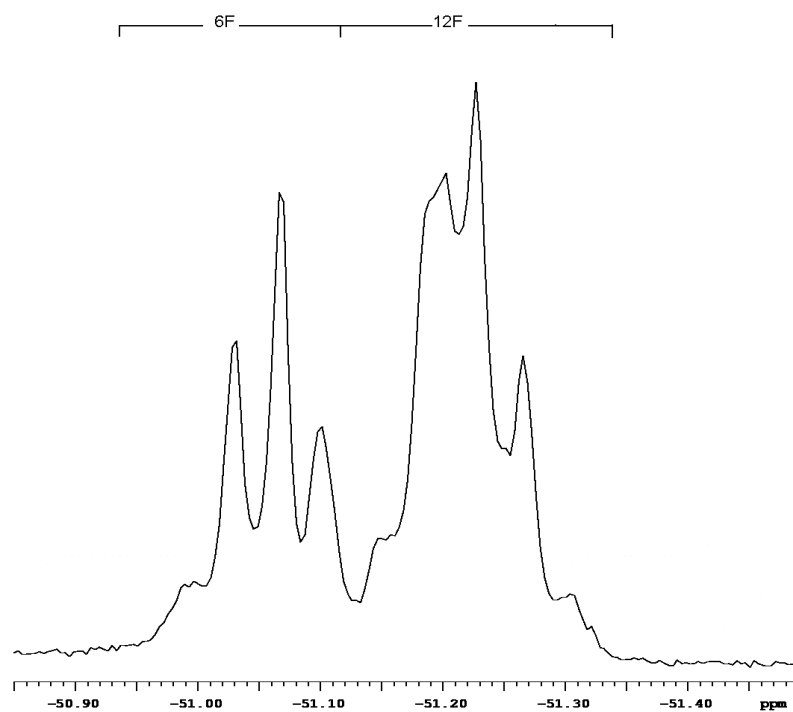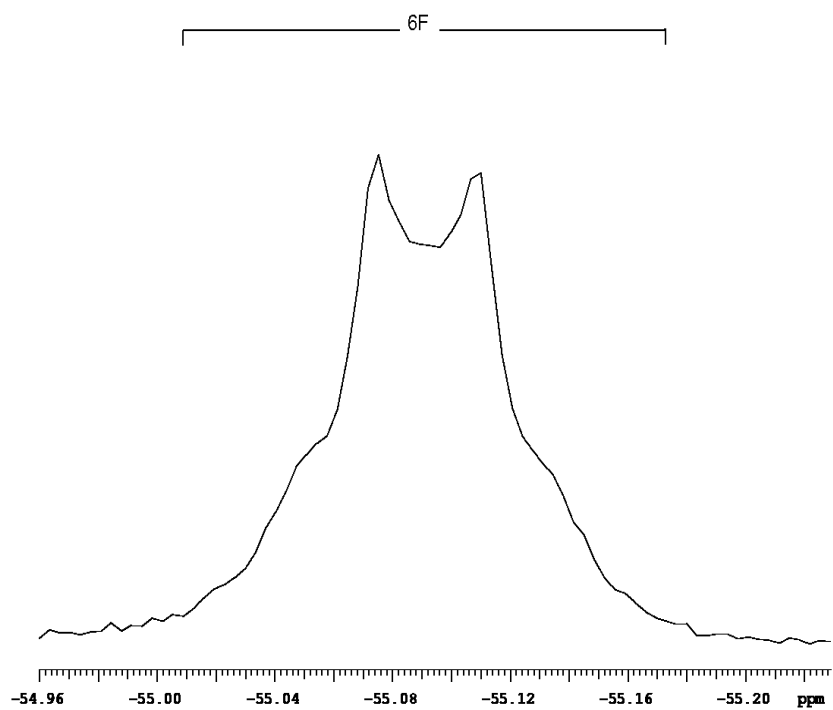

(c)

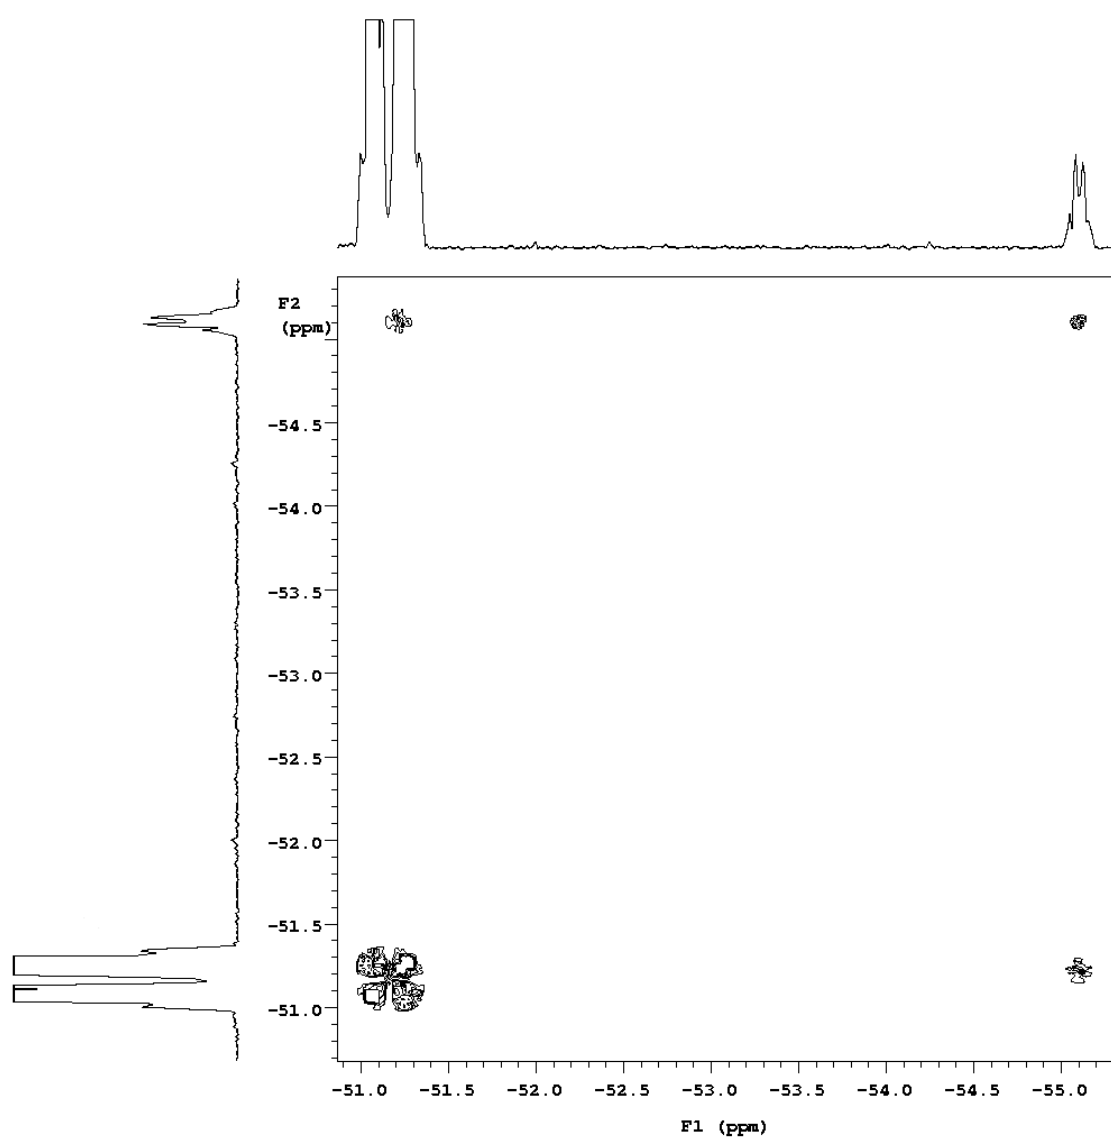

**Figure S6.**  $^{19}\text{F}$  NMR spectra of  $\text{Cu}[(\text{CF}_3)_8\text{T}(p\text{-F-P})\text{C}]$ : (a) the full range, (b) (i) and (ii) are expanded views of the peaks, and (c) the  $^{19}\text{F}$ - $^{19}\text{F}$  COSY of the region between -55.2 and -50.5 ppm.

(a)

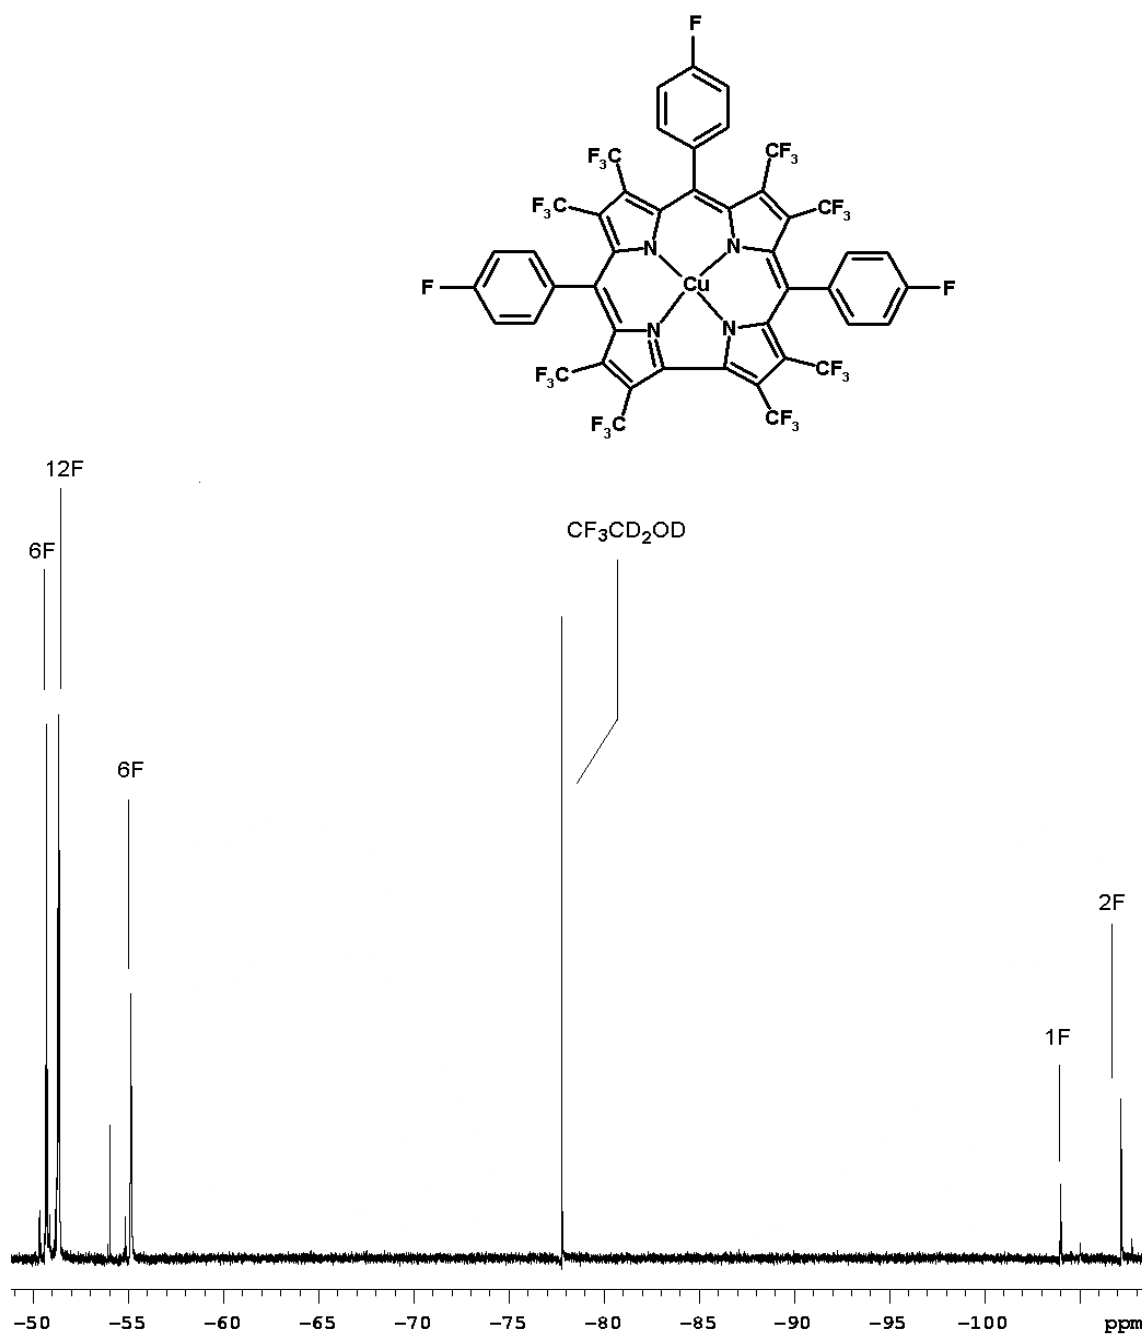



(b) (i)

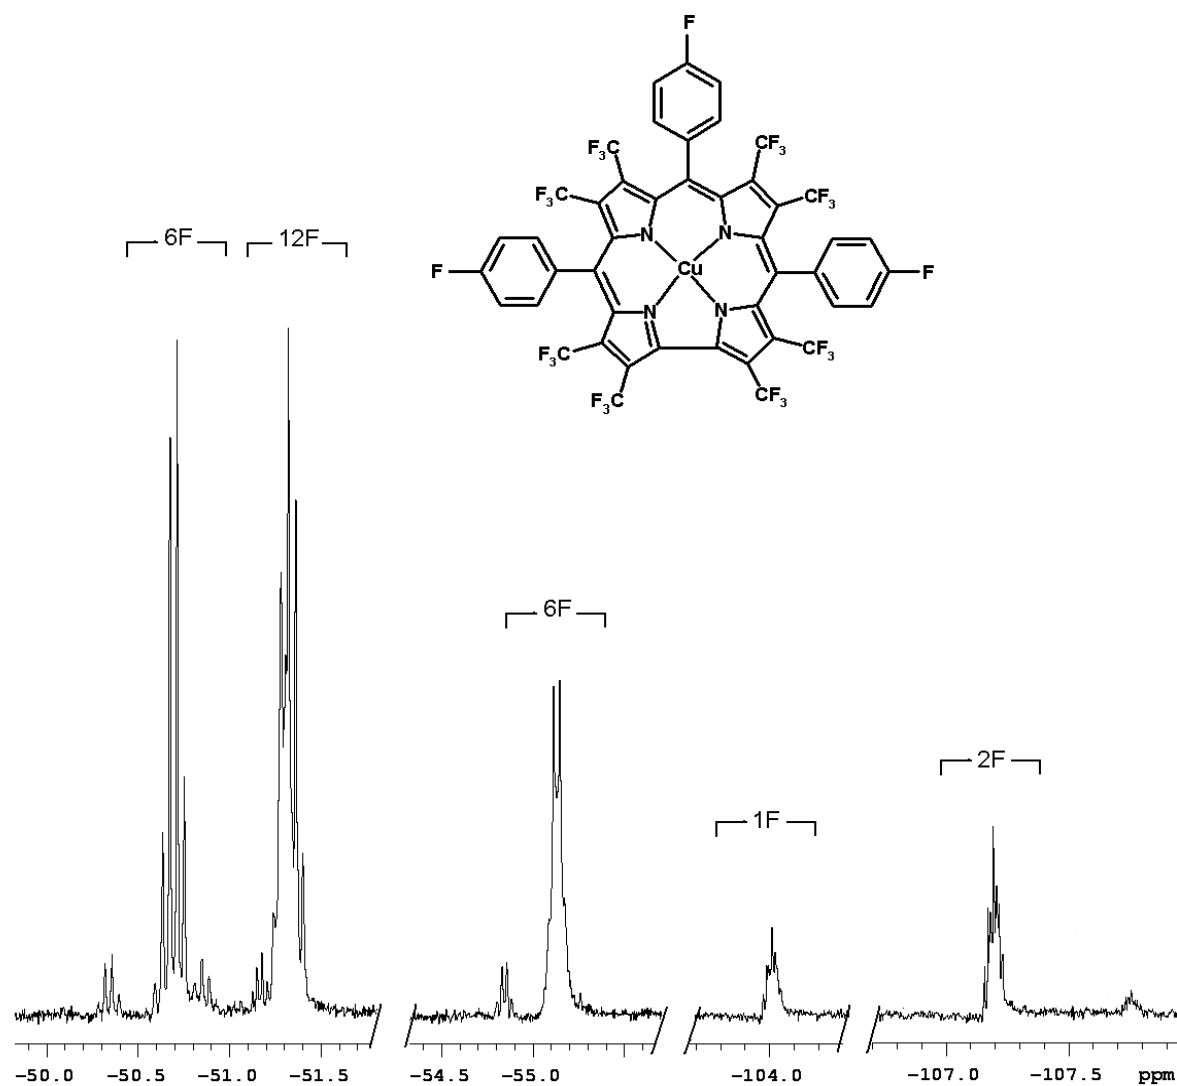

**(b) (ii)**

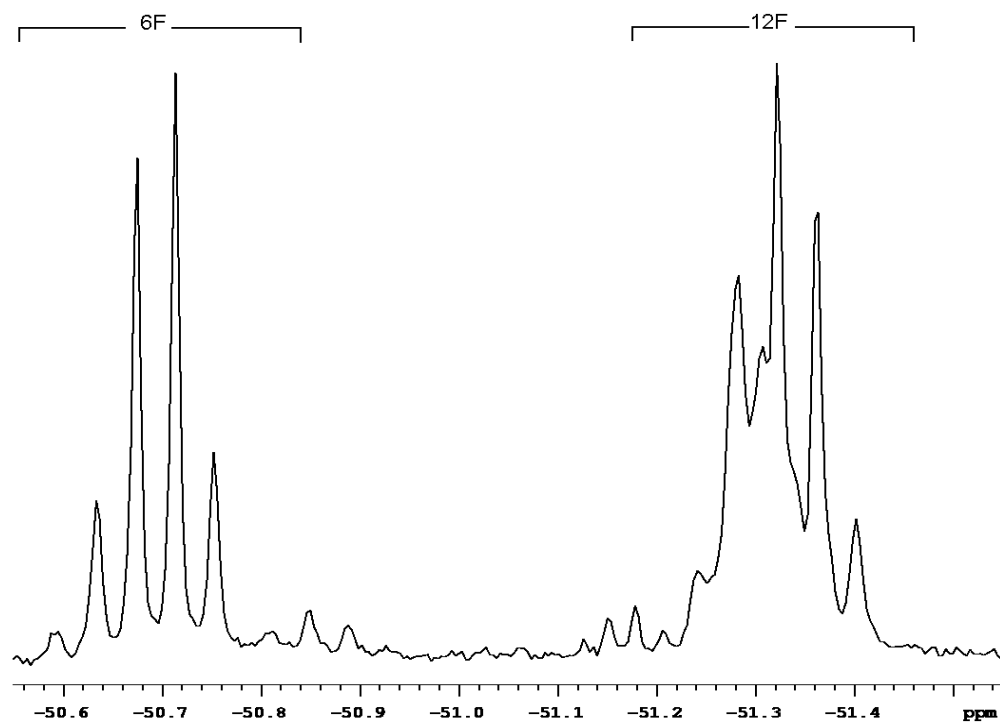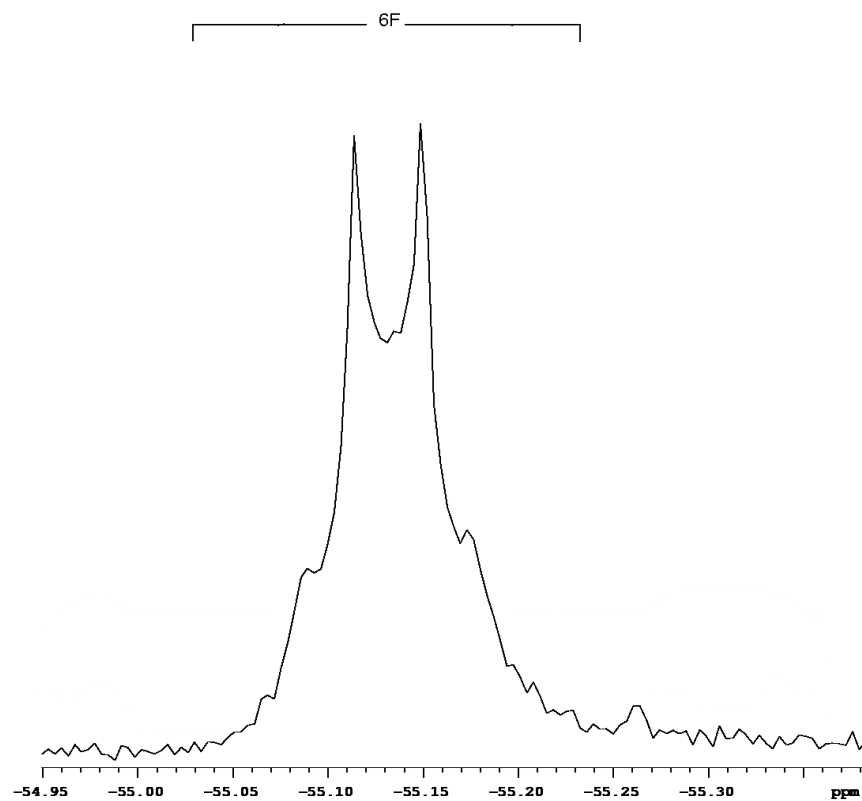

(c)

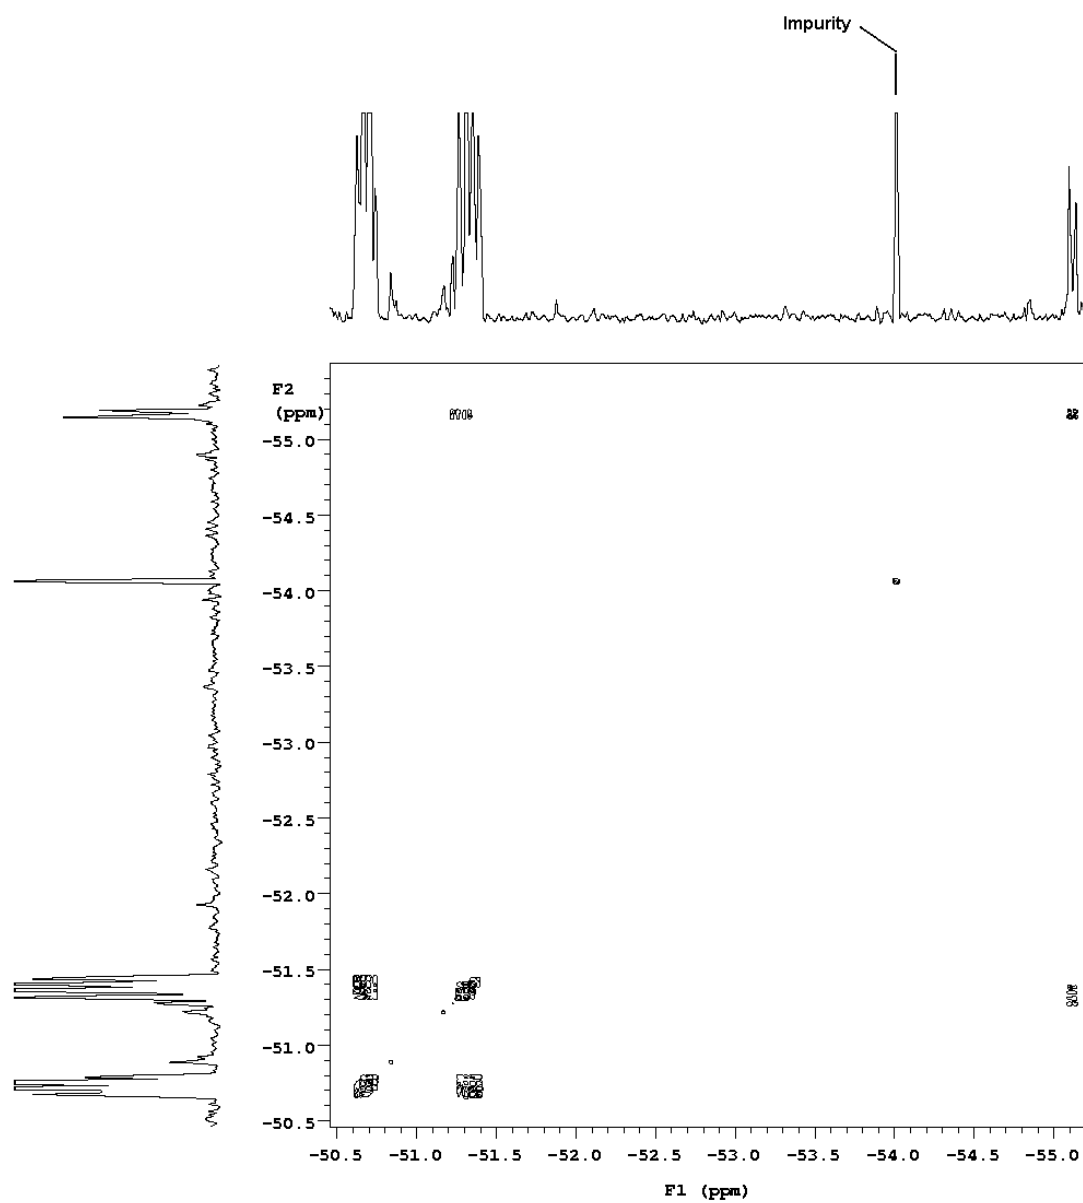

## Mass Spectra

**Figure S7.** Mass spectra of  $\text{Cu}[(\text{CF}_3)_8\text{TPC}]$ : (a) the full range, (b) an expanded view of isotopomers with inserted theoretical mass spectrum.

(a)

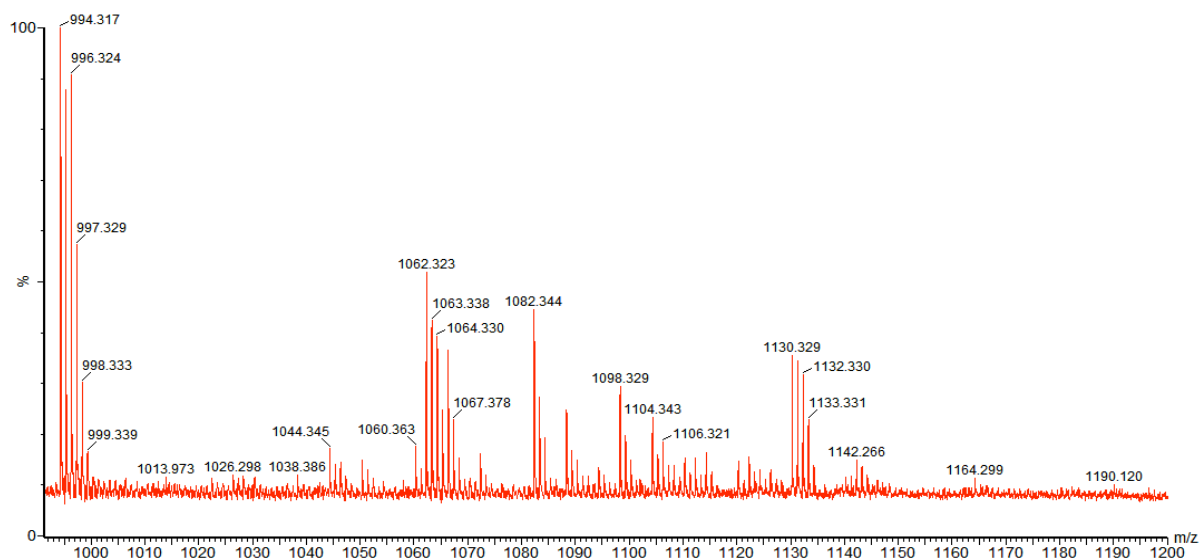

(b)

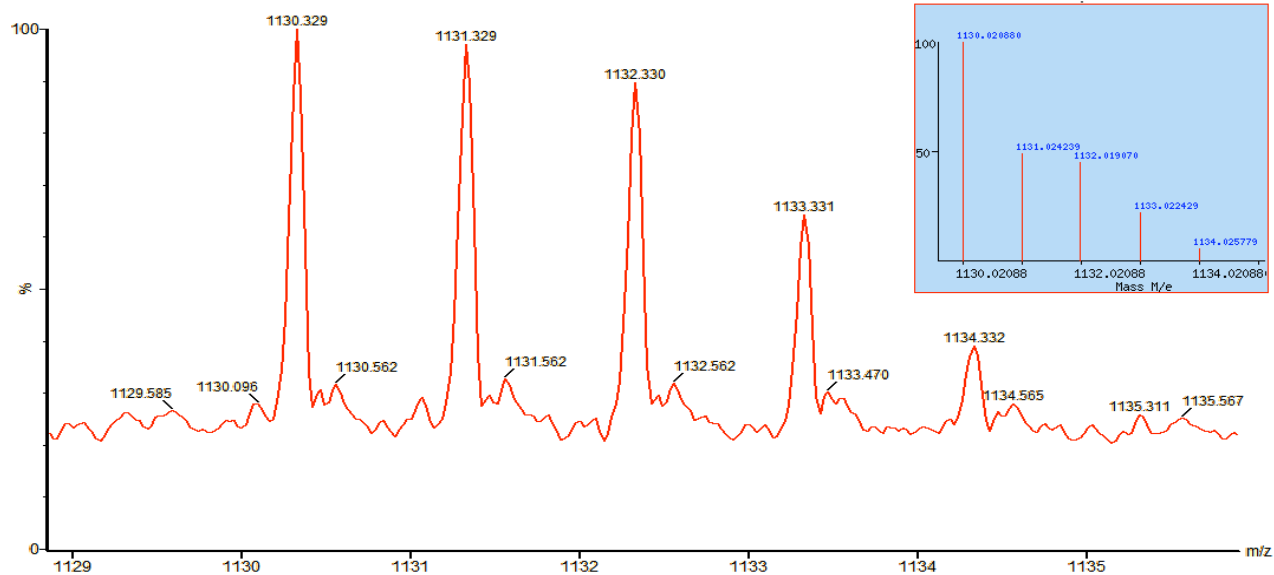

**Figure S8.** Mass spectra of  $\text{Cu}[(\text{CF}_3)_8\text{T}(p\text{-MeP})\text{C}]$ : (a) the full range, (b) an expanded view of isotopomers with inserted theoretical mass spectrum.

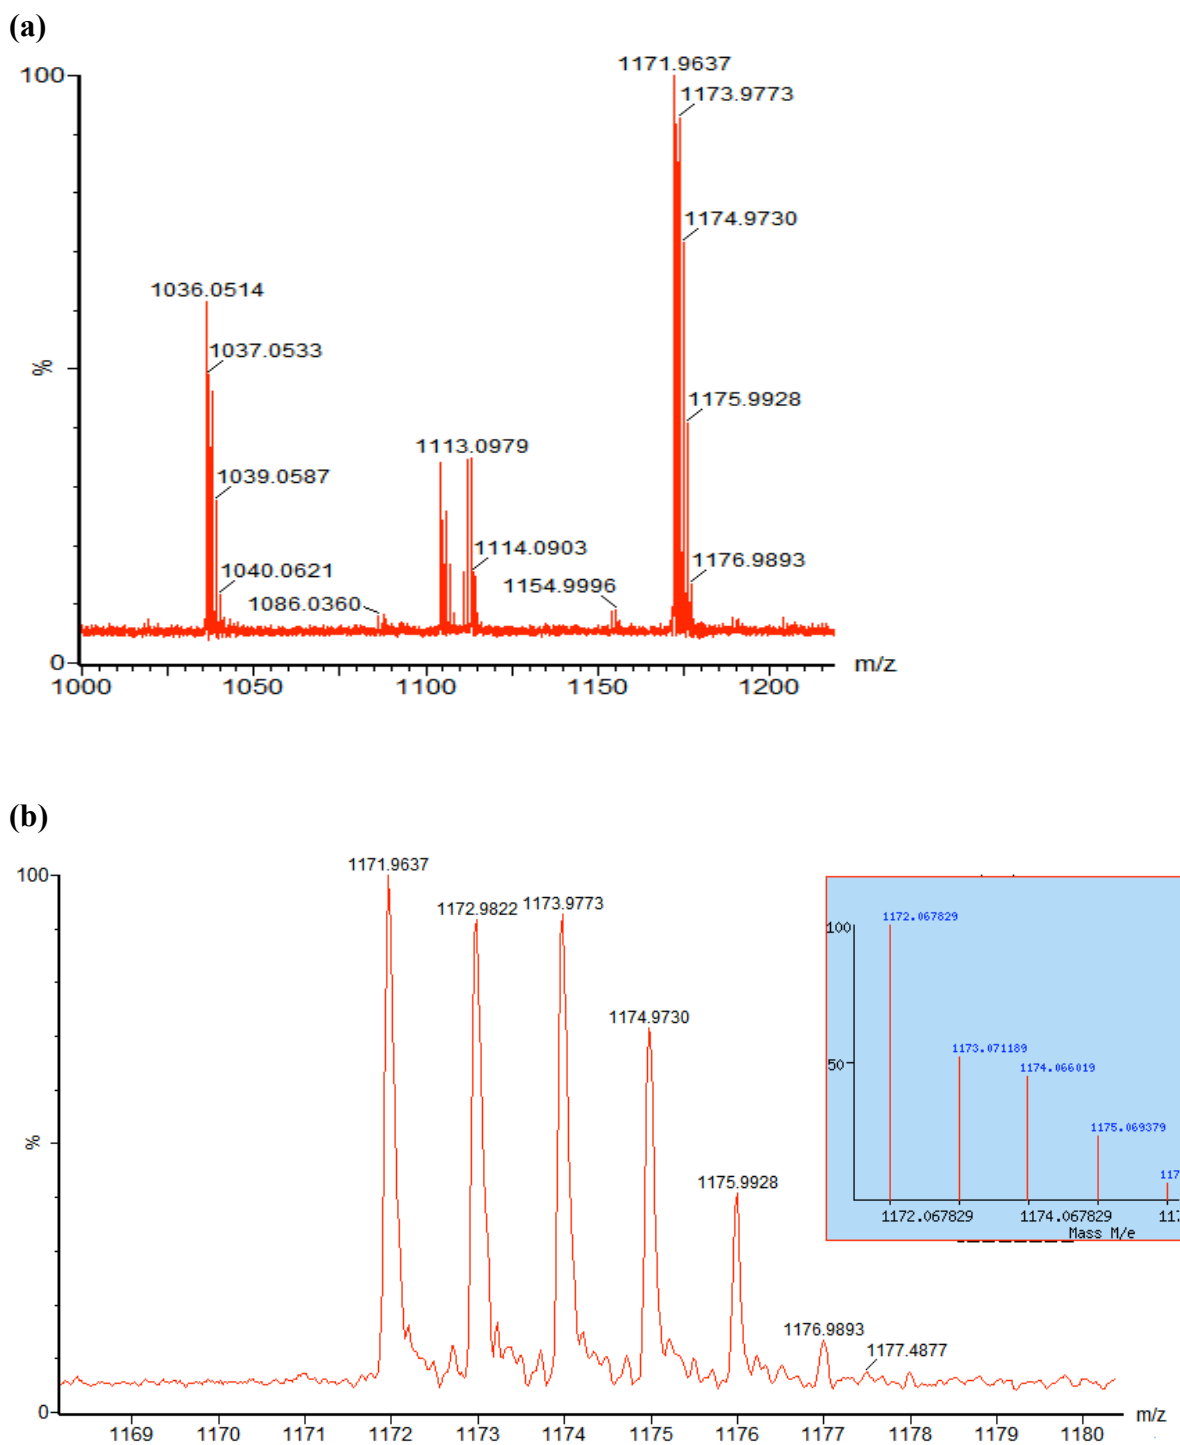

**Figure S9.** Mass spectra of  $\text{Cu}[(\text{CF}_3)_8\text{T}(p\text{-OMeP})\text{C}]$ : (a) the full range, (b) an expanded view of isotopomers with inserted theoretical mass spectrum.

(a)

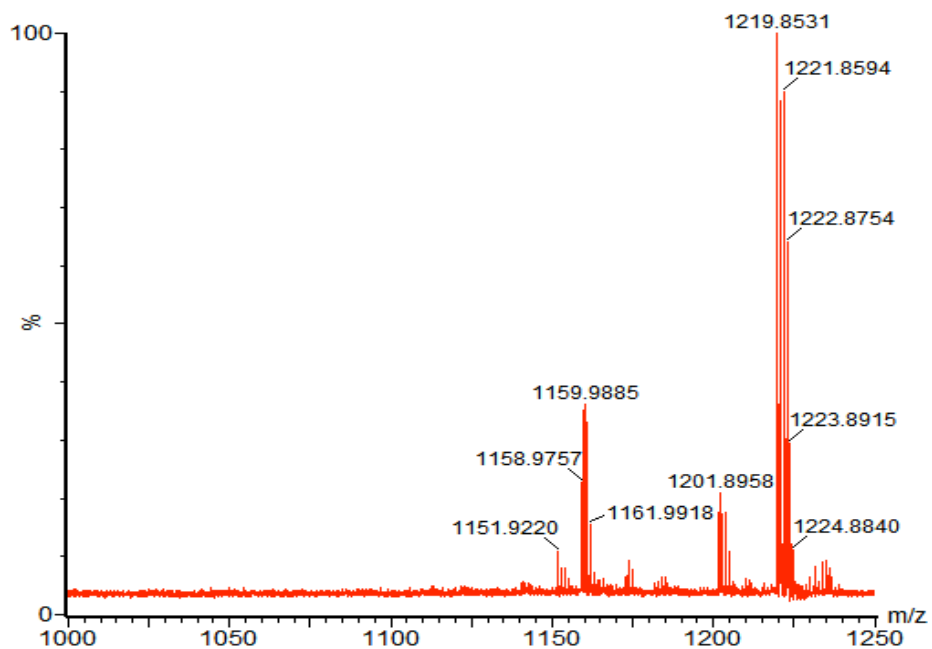

(b)

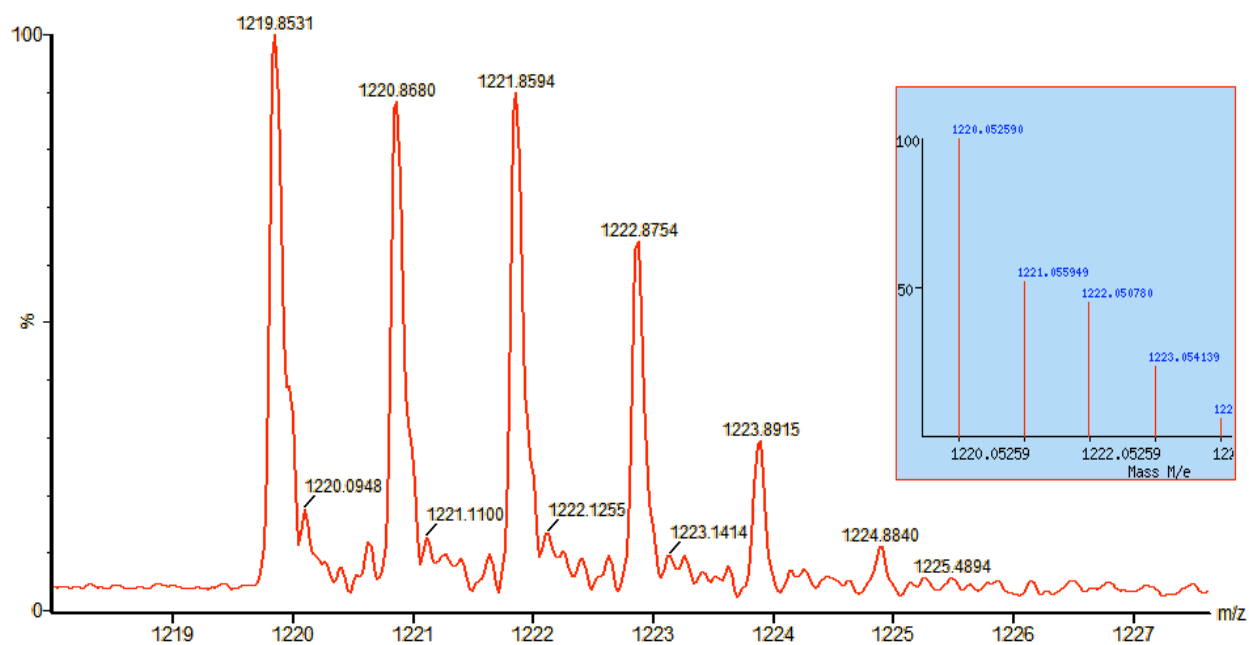

**Figure S10.** Mass spectra of  $\text{Cu}[(\text{CF}_3)_8\text{T}(p\text{-FP})\text{C}]$ : (a) the full range, (b) an expanded view of isotopomers with inserted theoretical mass spectrum.

(a)

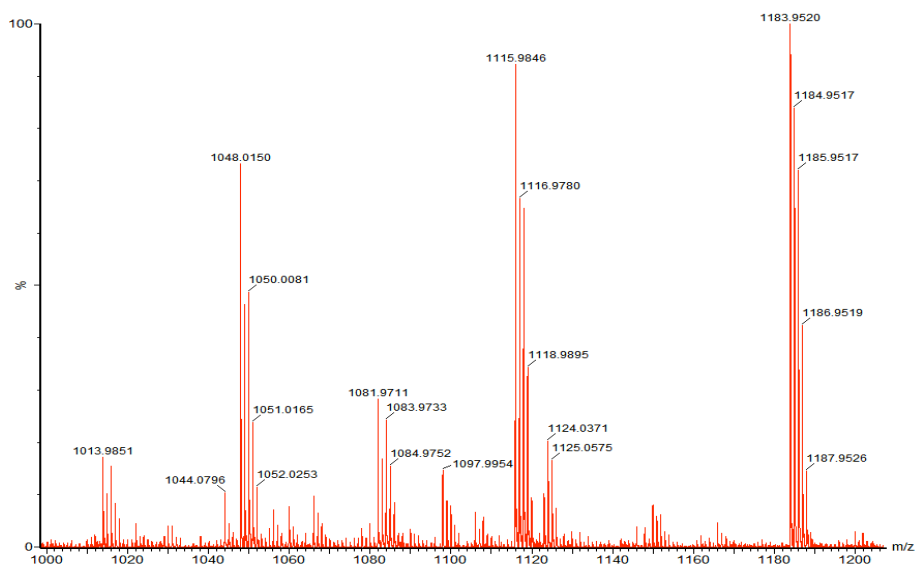

(b)

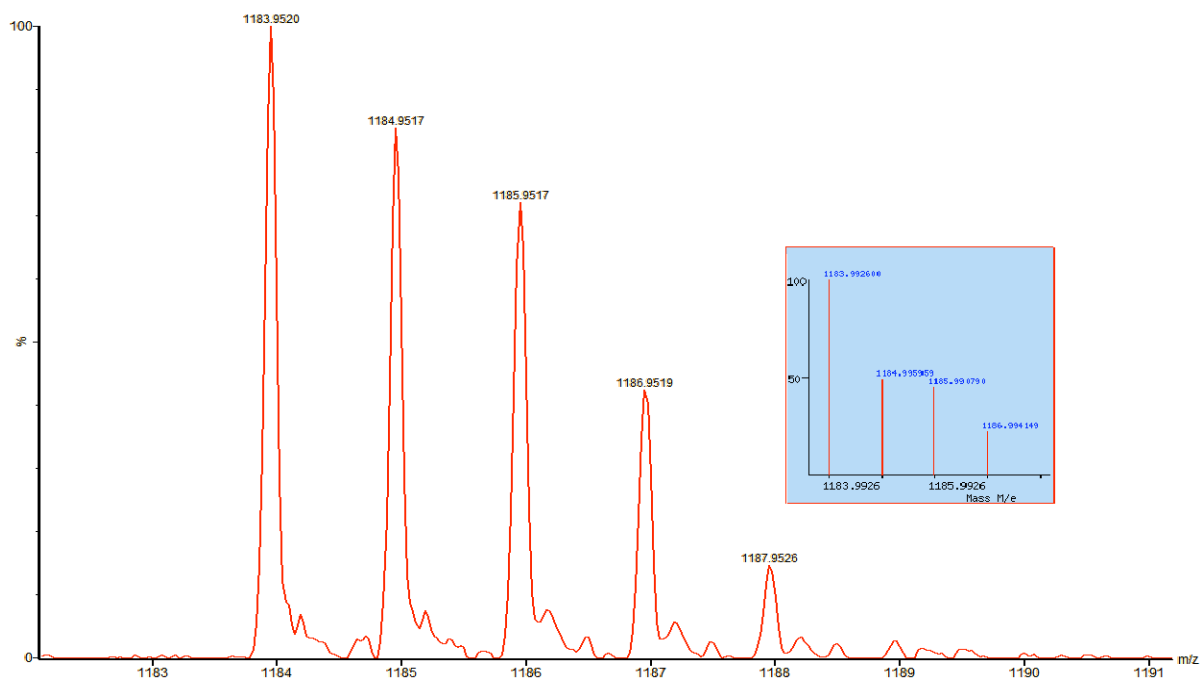

## Elemental Analyses

**Figure S11.** Elemental Composition of  $\text{Cu}[(\text{CF}_3)_8\text{TPC}]$

**ATLANTIC MICROLAB, INC.**

Sample No. p-H (4.9 mg)

P.O. Box 2288  
Norcross, Georgia 30091  
(770) 242-0082  
[www.atlanticmicrolab.com](http://www.atlanticmicrolab.com)

PROFESSOR/SUPERVISOR:  
P.O. #:

SUBMITTER  
Company / School Dept of Chemistry  
Address MAT-NAT Faculty  
University of Tromsø  
9037 - Tromsø, Norway  
NAME Kolle Ekaney Thomas DATE 19/06/07

| Element | Theory | Found |  | Single <input checked="" type="checkbox"/> Duplicate <input type="checkbox"/>                                                                                                                                                                                                                                                                                                                                                                                                                                                                                                                                                |
|---------|--------|-------|--|------------------------------------------------------------------------------------------------------------------------------------------------------------------------------------------------------------------------------------------------------------------------------------------------------------------------------------------------------------------------------------------------------------------------------------------------------------------------------------------------------------------------------------------------------------------------------------------------------------------------------|
|         |        |       |  |                                                                                                                                                                                                                                                                                                                                                                                                                                                                                                                                                                                                                              |
| C       | 47.78  | 47.28 |  | Elements Present: <u>C, H, N, F, Cu</u><br>Analyze for: <u>C, H and N</u><br>Hygroscopic <input type="checkbox"/> Explosive <input type="checkbox"/><br>M.P. _____ B.P. _____<br>To be dried: Yes <input checked="" type="checkbox"/> No <input type="checkbox"/><br>Temp. _____ Vac. <input checked="" type="checkbox"/> Time <u>1 hour at room temperature</u><br>FAX Service <input type="checkbox"/> EMAIL Service <input checked="" type="checkbox"/><br>FAX# / EMAIL <u>thomas.kolle@chem.u.t.no</u><br>Rush Service <input type="checkbox"/> (SEE CURRENT PRICE LIST)<br>Phone No. <u>+47 97560780 / +47 77644060</u> |
| H       | 1.34   | 1.76  |  |                                                                                                                                                                                                                                                                                                                                                                                                                                                                                                                                                                                                                              |
| N       | 4.45   | 4.89  |  |                                                                                                                                                                                                                                                                                                                                                                                                                                                                                                                                                                                                                              |
|         |        |       |  |                                                                                                                                                                                                                                                                                                                                                                                                                                                                                                                                                                                                                              |
|         |        |       |  |                                                                                                                                                                                                                                                                                                                                                                                                                                                                                                                                                                                                                              |
|         |        |       |  |                                                                                                                                                                                                                                                                                                                                                                                                                                                                                                                                                                                                                              |

Date Received JUN 25 2007 Date Completed JUN 26 2007

Remarks: \_\_\_\_\_



Figure S12. Elemental Composition of  $\text{Cu}[(\text{CF}_3)_8\text{T}(p\text{-MeP})\text{C}]$

**ATLANTIC MICROLAB, INC.**

Sample No. p-Me (5.1mg)

P.O. Box 2288  
Norcross, Georgia 30091  
(770) 242-0082  
**www.atlanticmicrolab.com**

PROFESSOR/SUPERVISOR:  
P.O. #:

SUBMITTER  
Company / School Dept of Chemistry  
Address Maths & Natural Science Faculty  
University of Tromsø  
9037-Tromsø, NORWAY

NAME Kolle Ekanay Thomas DATE 27/04/2007  
email: thomas.kolle@chem.uio.no

| Element | Theory | Found                    |       |
|---------|--------|--------------------------|-------|
| C       | 49.14% | 50.34                    | 50.52 |
| H       | 1.80%  | 2.25                     | 2.22  |
| N       | 4.78%  | 4.58                     | 4.69  |
| F       | 38.86% | 38.50                    |       |
|         |        | NO CHARGE FOR DUPLICATES |       |

Single ☒ Duplicate ☐

Elements Present: C, H, N, F, Cu

Analyze for: C, H, N and F (if possible)

Hygroscopic ☐ Explosive ☐

M.P. \_\_\_\_\_ B.P. \_\_\_\_\_

To be dried: Yes ☐ No ☒

Temp. \_\_\_\_\_ Vac. \_\_\_\_\_ Time \_\_\_\_\_

FAX Service ☐

FAX Phone # \_\_\_\_\_

Rush Service ☐ (SEE CURRENT PRICE LIST)

Phone Service ☒

Phone No. +47 776 44060 / +47 97560780

Date Received MAY 03 2007 Date Completed MAY 07 2007

Remarks:

**Figure S13.** Elemental Composition of  $\text{Cu}[(\text{CF}_3)_8\text{T}(p\text{-OMeP})\text{C}]$

**ATLANTIC MICROLAB, INC.**

Sample No. p-OMe (5.9 mg)

P.O. Box 2288  
Norcross, Georgia 30091  
(770) 242-0082  
[www.atlanticmicrolab.com](http://www.atlanticmicrolab.com)  
PROFESSOR/SUPERVISOR:  
P.O. #:

SUBMITTER  
Company / School Dept of Chemistry  
Address MAT-NAT Faculty  
University of Tromsø  
9037 - Tromsø, Norway.  
NAME Kolle Ekaney Thomas DATE 19/06/07

| Element | Theory  | Found |  |
|---------|---------|-------|--|
| C       | 47.21 % | 46.91 |  |
| H       | 1.73 %  | 1.83  |  |
| N       | 4.59 %  | 4.59  |  |
|         |         |       |  |
|         |         |       |  |
|         |         |       |  |

Single ☒ Duplicate ☐  
Elements Present: C, H, N, O, F, Cu  
Analyze for: C, H, N  
Hygroscopic ☐ Explosive ☐  
M.P. \_\_\_\_\_ B.P. \_\_\_\_\_  
To be dried: Yes ☒ No ☐  
Temp. \_\_\_\_\_ Vac. ☒ Time 1 hour at room temperature  
FAX Service ☐ EMAIL Service ☐ RM  
FAX# / EMAIL Thomas.Kolle@Chem.uio.no  
Rush Service ☐ (SEE CURRENT  
Phone Service ☐ PRICE LIST)  
Phone No. +47 97560780 / +47 77644060

Date Received JUN 25 2007  
Remarks: \_\_\_\_\_ Date Completed JUN 26 2007

**Figure S14.** Elemental Composition of  $\text{Cu}[(\text{CF}_3)_8\text{T}(p\text{-F-P})\text{C}]$

# ATLANTIC MICROLAB, INC.

Sample No. p-F<sub>2</sub>(5.6mg)

## SUBMITTER

P.O. Box 2288  
Norcross, Georgia 30091  
(770) 242-0082

Company / School Dept of Chemistry, MAT-NAT

Address University of Tromsø,  
9037 Tromsø, Norway

**www.atlanticmicrolab.com**

PROFESSOR/SUPERVISOR:  
P.O. #:

NAME Kolle Ekaney Thomas DATE 03-06-08

thomas.kolle@chem.uio.no

| Element | Theory  | Found                    |       | Single <input checked="" type="checkbox"/>                                             | Duplicate <input type="checkbox"/> |
|---------|---------|--------------------------|-------|----------------------------------------------------------------------------------------|------------------------------------|
|         |         |                          |       | Elements Present: C, H, N, F, Cu                                                       |                                    |
| C       | 45.61 % | 46.31                    | 46.33 | Analyze for: C,H,N                                                                     |                                    |
| H       | 1.02 %  | 1.70                     | 1.68  | Hygroscopic <input type="checkbox"/> Explosive <input type="checkbox"/>                |                                    |
| N       | 4.73 %  | 4.40                     | 4.36  | M.P. _____ B.P. _____                                                                  |                                    |
|         |         | NO CHARGE FOR DUPLICATES |       | To be dried: Yes <input checked="" type="checkbox"/> No <input type="checkbox"/>       |                                    |
|         |         |                          |       | Temp. R.T. _____ Vac. <input checked="" type="checkbox"/> Time 1 hour                  |                                    |
|         |         |                          |       | FAX Service <input type="checkbox"/> EMAIL Service <input checked="" type="checkbox"/> |                                    |
|         |         |                          |       | FAX# /EMAIL <u>thomas.kolle@chem.uio.no</u>                                            |                                    |
|         |         |                          |       | Rush Service <input type="checkbox"/> (SEE CURRENT                                     |                                    |
|         |         |                          |       | Phone Service <input checked="" type="checkbox"/> PRICE LIST)                          |                                    |
|         |         |                          |       | Phone No. <u>+ 47 776 44060</u> / <u>+ 47 77620910</u>                                 |                                    |

Date Received JUN 06 2008  
Remarks:

Date Completed JUN 09 2008

+ 47 97560780
